# Supplementary material for: Deaths, Disparities, and Cumulative (Dis)Advantage: How Social Inequities Produce an Impairment Paradox in Later Life
Source: PubMed Central journal article supplement — J Gerontol A Biol Sci Med Sci. 2021 Jun 24;77(2):392–401. doi: 10.1093/gerona/glab181 (PMC8824561; doi:10.1093/gerona/glab181), 2021-06-24
Supplement: glab181_suppl_supplementary_tables_and_figures.pdf [file glab181_suppl_supplementary_tables_and_figures.pdf]

Supplemental Materials for:

Deaths, Disparities, and Cumulative (Dis)Advantage: How Social Inequities Produce an Impairment Paradox in Later Life

Heide Jackson and Michal Engelman

Table A1: Social Characteristics by Race and Gender

|                                                                   | White<br>Women<br>N=3,662 | White<br>Men<br>N=3,317 | Black<br>Women<br>N=887 | Black<br>Men<br>N=598 |
|-------------------------------------------------------------------|---------------------------|-------------------------|-------------------------|-----------------------|
| Less than HS Diploma                                              | 0.251                     | 0.247                   | 0.453                   | 0.455                 |
| Completed HS                                                      | 0.396                     | 0.298                   | 0.281                   | 0.279                 |
| Some College                                                      | 0.205                     | 0.208                   | 0.157                   | 0.177                 |
| Completed College Degree                                          | 0.148                     | 0.247                   | 0.109                   | 0.088                 |
| Respondent Married at Round 2                                     | 0.721                     | 0.811                   | 0.424                   | 0.672                 |
| Respondent Ever Smoked at Round 2                                 | 0.547                     | 0.743                   | 0.559                   | 0.736                 |
| 1st Wealth Quintile (Lowest Wealth)                               | 0.149                     | 0.128                   | 0.411                   | 0.321                 |
| 2nd Wealth Quintile                                               | 0.167                     | 0.153                   | 0.271                   | 0.262                 |
| 3rd Wealth Quintile                                               | 0.196                     | 0.209                   | 0.183                   | 0.188                 |
| 4th Wealth Quintile                                               | 0.228                     | 0.237                   | 0.091                   | 0.171                 |
| 5th Wealth Quintile (Highest Wealth)                              | 0.260                     | 0.273                   | 0.043                   | 0.057                 |
| No Longest Occupation Reported                                    | 0.143                     | 0.091                   | 0.135                   | 0.118                 |
| Longest Occupation Professional, Managerial,<br>Clerical or Sales | 0.601                     | 0.474                   | 0.337                   | 0.239                 |
| Longest Occupation Production, Service,<br>Operations or Farming  | 0.257                     | 0.436                   | 0.528                   | 0.643                 |

Table A2: Predicted Probabilities from Multinomial Logistic Regression for Average Person of Each Race Gender Group

|                                                                   | Predicted Probabilities for Average Person of Each Race Gender |        |        |           |        |        |             |        |        |           |        |        |
|-------------------------------------------------------------------|----------------------------------------------------------------|--------|--------|-----------|--------|--------|-------------|--------|--------|-----------|--------|--------|
|                                                                   | White Women                                                    |        |        | White Men |        |        | Black Women |        |        | Black Men |        |        |
| P(Same or Better Functional Status)                               | 0.168                                                          | (0.154 | 0.183) | 0.156     | (0.141 | 0.170) | 0.132       | (0.104 | 0.162) | 0.120     | (0.085 | 0.155) |
| P(Increased Functional Impairment)                                | 0.335                                                          | (0.317 | 0.352) | 0.243     | (0.225 | 0.258) | 0.302       | (0.262 | 0.342) | 0.194     | (0.153 | 0.238) |
| P(Increased Functional Impairment Conditional on Being In-Sample) | 0.666                                                          | (0.641 | 0.690) | 0.609     | (0.579 | 0.639) | 0.695       | (0.635 | 0.753) | 0.617     | (0.520 | 0.712) |
| P(Death)                                                          | 0.295                                                          | (0.276 | 0.312) | 0.403     | (0.382 | 0.426) | 0.411       | (0.373 | 0.455) | 0.582     | (0.525 | 0.638) |
| P(Lost to Follow Up)                                              | 0.203                                                          | (0.188 | 0.218) | 0.198     | (0.183 | 0.214) | 0.153       | (0.127 | 0.184) | 0.104     | (0.070 | 0.140) |
| P(Death Conditional on Non-Response)                              | 0.593                                                          | (0.564 | 0.618) | 0.670     | (0.645 | 0.696) | 0.728       | (0.681 | 0.773) | 0.849     | (0.797 | 0.894) |

Table A2 cont.: Predicted Probabilities from Multinomial Logistic Regression for Advantaged Person of Each Race Gender Group

|                                                                   | Predicted Probabilities for Advantaged Health and Social Characteristics |        |        |           |        |        |             |        |        |           |        |        |
|-------------------------------------------------------------------|--------------------------------------------------------------------------|--------|--------|-----------|--------|--------|-------------|--------|--------|-----------|--------|--------|
|                                                                   | White Women                                                              |        |        | White Men |        |        | Black Women |        |        | Black Men |        |        |
| P(Same or Better Functional Status)                               | 0.293                                                                    | (0.241 | 0.351) | 0.295     | (0.243 | 0.348) | 0.113       | (0.033 | 0.247) | 0.140     | (0.028 | 0.353) |
| P(Increased Functional Impairment)                                | 0.425                                                                    | (0.368 | 0.488) | 0.336     | (0.285 | 0.390) | 0.448       | (0.241 | 0.683) | 0.257     | (0.060 | 0.518) |
| P(Increased Functional Impairment Conditional on Being In-Sample) | 0.591                                                                    | (0.522 | 0.665) | 0.534     | (0.457 | 0.604) | 0.798       | (0.552 | 0.944) | 0.650     | (0.237 | 0.921) |
| P(Death)                                                          | 0.090                                                                    | (0.066 | 0.115) | 0.155     | (0.125 | 0.191) | 0.194       | (0.070 | 0.399) | 0.193     | (0.057 | 0.426) |
| P(Lost to Follow Up)                                              | 0.189                                                                    | (0.148 | 0.232) | 0.212     | (0.173 | 0.256) | 0.219       | (0.068 | 0.406) | 0.368     | (0.137 | 0.674) |
| P(Death Conditional on Non-Response)                              | 0.322                                                                    | (0.241 | 0.404) | 0.423     | (0.350 | 0.500) | 0.466       | (0.209 | 0.786) | 0.343     | (0.101 | 0.700) |

Table A2 cont.: Predicted Probabilities from Multinomial Logistic Regression for Disadvantaged Person of Each Race Gender Group

| Predicted Probabilities for Disadvantaged Health and Social Characteristics |             |        |        |           |        |        |             |        |        |           |        |        |
|-----------------------------------------------------------------------------|-------------|--------|--------|-----------|--------|--------|-------------|--------|--------|-----------|--------|--------|
|                                                                             | White Women |        |        | White Men |        |        | Black Women |        |        | Black Men |        |        |
| P(Same or Better Functional Status)                                         | 0.078       | (0.053 | 0.107) | 0.065     | (0.040 | 0.099) | 0.102       | (0.064 | 0.154) | 0.045     | (0.019 | 0.087) |
| P(Increased Functional Impairment)                                          | 0.166       | (0.133 | 0.206) | 0.068     | (0.046 | 0.099) | 0.188       | (0.137 | 0.256) | 0.071     | (0.038 | 0.123) |
| P(Increased Functional Impairment Conditional on Being In-Sample)           | 0.682       | (0.586 | 0.772) | 0.517     | (0.374 | 0.646) | 0.646       | (0.520 | 0.763) | 0.615     | (0.387 | 0.815) |
| P(Death)                                                                    | 0.635       | (0.571 | 0.688) | 0.771     | (0.713 | 0.824) | 0.607       | (0.520 | 0.689) | 0.850     | (0.782 | 0.907) |
| P(Lost to Follow Up)                                                        | 0.120       | (0.090 | 0.159) | 0.093     | (0.061 | 0.131) | 0.096       | (0.059 | 0.145) | 0.029     | (0.008 | 0.064) |
| P(Death Conditional on Non-Response)                                        | 0.840       | (0.788 | 0.883) | 0.892     | (0.848 | 0.930) | 0.863       | (0.793 | 0.919) | 0.968     | (0.926 | 0.991) |

Table A3: Multinomial Logistic Regression Results from Models Predicting Health Outcomes for White Men and Women at Wave 6 of the HRS

|                                                                | White Women                            |               |          |                   |          |                                        | White Men |               |                   |               |          |               |
|----------------------------------------------------------------|----------------------------------------|---------------|----------|-------------------|----------|----------------------------------------|-----------|---------------|-------------------|---------------|----------|---------------|
|                                                                | Limitations Higher than First Observed |               | Died     | Lost to Follow Up |          | Limitations Higher than First Observed |           | Died          | Lost to Follow Up |               |          |               |
| Functional Limitations Round 2                                 | 0.908***                               | (0.876-0.942) | 1.152*** | (1.091-1.216)     | 0.890*** | (0.841-0.941)                          | 0.925***  | (0.884-0.968) | 1.155***          | (1.094-1.220) | 0.947    | (0.885-1.014) |
| Birth Year                                                     | 0.975*                                 | (0.951-1.000) | 0.897*** | (0.854-0.943)     | 0.999    | (0.965-1.035)                          | 0.969*    | (0.942-0.996) | 0.886***          | (0.849-0.924) | 1.000    | (0.964-1.038) |
| Less than HS Diploma                                           | 1.419*                                 | (1.054-1.911) | 1.382    | (0.714-2.672)     | 2.355*** | (1.544-3.592)                          | 1.393*    | (1.045-1.857) | 1.205             | (0.743-1.952) | 2.003*** | (1.359-2.950) |
| Completed HS                                                   | 1.178                                  | (0.916-1.514) | 1.247    | (0.670-2.324)     | 1.824**  | (1.263-2.636)                          | 1.188     | (0.923-1.530) | 1.190             | (0.763-1.854) | 1.635**  | (1.144-2.339) |
| Some College                                                   | 0.994                                  | (0.758-1.303) | 1.191    | (0.612-2.315)     | 1.264    | (0.839-1.905)                          | 1.124     | (0.862-1.467) | 1.568*            | (1.009-2.435) | 1.689**  | (1.167-2.442) |
| Ever Smoked at Round 2                                         | 1.254**                                | (1.070-1.470) | 2.612*** | (1.861-3.666)     | 0.998    | (0.799-1.245)                          | 1.182     | (0.972-1.438) | 2.521***          | (1.722-3.690) | 1.325*   | (1.003-1.749) |
| Married at Round 2                                             | 0.825*                                 | (0.684-0.995) | 0.945    | (0.659-1.356)     | 0.899    | (0.689-1.172)                          | 0.941     | (0.734-1.205) | 0.642*            | (0.455-0.906) | 0.748    | (0.546-1.025) |
| 1st Wealth Quintile (Lowest Wealth)                            | 1.382*                                 | (1.031-1.853) | 1.889*   | (1.050-3.400)     | 1.460    | (0.976-2.182)                          | 1.229     | (0.890-1.696) | 1.723*            | (1.059-2.805) | 0.819    | (0.527-1.271) |
| 2nd Wealth Quintile                                            | 1.755***                               | (1.352-2.278) | 1.748*   | (1.006-3.037)     | 1.227    | (0.848-1.776)                          | 1.415*    | (1.072-1.868) | 1.609*            | (1.026-2.523) | 1.024    | (0.701-1.495) |
| 3rd Wealth Quintile                                            | 1.334*                                 | (1.048-1.698) | 2.148**  | (1.274-3.622)     | 1.287    | (0.922-1.797)                          | 0.960     | (0.744-1.238) | 1.150             | (0.751-1.760) | 0.717    | (0.510-1.008) |
| 4th Wealth Quintile                                            | 1.137                                  | (0.903-1.432) | 1.545    | (0.904-2.639)     | 1.183    | (0.866-1.616)                          | 0.934     | (0.732-1.192) | 1.200             | (0.793-1.817) | 1.046    | (0.759-1.442) |
| No Longest Occupation                                          | 0.984                                  | (0.757-1.279) | 1.261    | (0.812-1.957)     | 1.080    | (0.758-1.537)                          | 0.887     | (0.639-1.231) | 1.323             | (0.841-2.080) | 1.031    | (0.677-1.568) |
| Longest Occupation Professional, Managerial, Clerical or Sales | 0.958                                  | (0.780-1.176) | 0.692    | (0.466-1.029)     | 0.928    | (0.703-1.226)                          | 0.832     | (0.675-1.024) | 0.905             | (0.656-1.250) | 0.781    | (0.596-1.022) |

3662

3317

Note. Relative Risk Ratios; Confidence interval in parentheses

\* p<0.05" \*\*p<.01 \*\*\*p<.0001

Table A3 cont.: Multinomial Logistic Regression Results from Models Predicting Health Outcomes for Black Men and Women at Wave 6 of the HRS

|                                                                         | Black Women                                  |                   |          |                   |                   | Black Men                                    |       |                   |          |                      |       |                   |
|-------------------------------------------------------------------------|----------------------------------------------|-------------------|----------|-------------------|-------------------|----------------------------------------------|-------|-------------------|----------|----------------------|-------|-------------------|
|                                                                         | Limitations<br>Higher than First<br>Observed |                   | Died     |                   | Lost to Follow Up | Limitations<br>Higher than First<br>Observed |       | Died              |          | Lost to Follow<br>Up |       |                   |
| Functional Limitations<br>Round 2                                       | 0.878***                                     | (0.827-<br>0.933) | 1.118**  | (1.034-<br>1.209) | 0.854***          | (0.780-<br>0.935)                            | 0.980 | (0.897-<br>1.070) | 1.182*** | (1.075-<br>1.298)    | 1.100 | (0.984-<br>1.230) |
| Birth Year                                                              | 1.021                                        | (0.969-<br>1.076) | 0.871*** | (0.804-<br>0.945) | 0.975             | (0.909-<br>1.046)                            | 0.959 | (0.894-<br>1.029) | 0.947    | (0.874-<br>1.025)    | 0.939 | (0.854-<br>1.033) |
| Less than HS Diploma                                                    | 0.812                                        | (0.414-<br>1.593) | 1.048    | (0.342-<br>3.216) | 1.780             | (0.731-<br>4.337)                            | 1.242 | (0.497-<br>3.103) | 0.602    | (0.184-<br>1.973)    | 0.611 | (0.212-<br>1.759) |
| Completed HS                                                            | 0.655                                        | (0.341-<br>1.255) | 0.794    | (0.279-<br>2.254) | 1.125             | (0.478-<br>2.646)                            | 1.396 | (0.567-<br>3.440) | 0.908    | (0.289-<br>2.854)    | 0.604 | (0.215-<br>1.693) |
| Some College                                                            | 0.592                                        | (0.306-<br>1.146) | 0.649    | (0.223-<br>1.890) | 0.653             | (0.278-<br>1.533)                            | 1.387 | (0.545-<br>3.532) | 0.852    | (0.255-<br>2.848)    | 0.977 | (0.351-<br>2.719) |
| Ever Smoked at Round<br>2                                               | 0.850                                        | (0.613-<br>1.178) | 1.511    | (0.922-<br>2.476) | 0.983             | (0.626-<br>1.545)                            | 0.983 | (0.604-<br>1.599) | 2.557**  | (1.290-<br>5.068)    | 0.750 | (0.420-<br>1.337) |
| Married at Round 2                                                      | 0.972                                        | (0.681-<br>1.388) | 0.555*   | (0.309-<br>0.998) | 1.195             | (0.729-<br>1.958)                            | 0.821 | (0.501-<br>1.345) | 0.357*** | (0.201-<br>0.635)    | 0.570 | (0.293-<br>1.107) |
| 1st Wealth Quintile<br>(Lowest Wealth)                                  | 1.398                                        | (0.610-<br>3.206) | 1.489    | (0.377-<br>5.887) | 1.278             | (0.412-<br>3.967)                            | 1.206 | (0.443-<br>3.285) | 5.417    | (0.624-<br>47.042)   | 0.532 | (0.169-<br>1.679) |
| 2nd Wealth Quintile                                                     | 1.206                                        | (0.534-<br>2.724) | 1.076    | (0.280-<br>4.139) | 1.125             | (0.368-<br>3.444)                            | 1.066 | (0.395-<br>2.879) | 5.431    | (0.635-<br>46.465)   | 0.750 | (0.243-<br>2.316) |
| 3rd Wealth Quintile                                                     | 1.687                                        | (0.733-<br>3.883) | 0.787    | (0.193-<br>3.212) | 1.646             | (0.518-<br>5.236)                            | 1.044 | (0.373-<br>2.919) | 7.350    | (0.876-<br>61.685)   | 0.666 | (0.213-<br>2.084) |
| 4th Wealth Quintile                                                     | 1.178                                        | (0.464-<br>2.991) | 0.969    | (0.220-<br>4.266) | 1.084             | (0.310-<br>3.790)                            | 0.706 | (0.243-<br>2.052) | 4.272    | (0.501-<br>36.461)   | 0.824 | (0.262-<br>2.591) |
| No Longest Occupation                                                   | 1.013                                        | (0.606-<br>1.694) | 2.073*   | (1.073-<br>4.002) | 1.709             | (0.873-<br>3.345)                            | 0.831 | (0.408-<br>1.693) | 0.671    | (0.306-<br>1.469)    | 0.297 | (0.081-<br>1.088) |
| Longest Occupation<br>Professional,<br>Managerial, Clerical or<br>Sales | 0.559*                                       | (0.351-<br>0.893) | 1.348    | (0.662-<br>2.742) | 1.465             | (0.804-<br>2.670)                            | 1.715 | (0.939-<br>3.131) | 0.770    | (0.371-<br>1.597)    | 1.184 | (0.550-<br>2.550) |

887

598

Note. Relative Risk Ratios; Confidence intervals in parentheses

\* p<0.05" \*\*p<.01 \*\*\*p<.0001

Table A4: Logistic Regression Results from Models Predicting Any Increase in Functional Limitations by Race and Gender

|                                                                   | White<br>Women |                   | White<br>Men |               | Black<br>Women |                   | Black Men |                   |
|-------------------------------------------------------------------|----------------|-------------------|--------------|---------------|----------------|-------------------|-----------|-------------------|
| Functional Limitations Round 2                                    | 0.878***       | (0.849-<br>0.909) | 0.874***     | (0.839-0.910) | 0.848***       | (0.803-<br>0.896) | 0.890**   | (0.825-<br>0.960) |
| Birth Year                                                        | 0.928***       | (0.906-<br>0.951) | 0.944***     | (0.920-0.967) | 0.958          | (0.913-<br>1.005) | 0.907**   | (0.855-<br>0.961) |
| Less than HS Diploma                                              | 1.218          | (0.920-<br>1.613) | 1.403*       | (1.076-1.829) | 0.586          | (0.304-<br>1.129) | 1.426     | (0.609-<br>3.341) |
| Completed HS                                                      | 1.225          | (0.966-<br>1.553) | 1.382**      | (1.096-1.742) | 0.663          | (0.348-<br>1.264) | 1.330     | (0.579-<br>3.056) |
| Some College                                                      | 1.139          | (0.880-<br>1.474) | 1.244        | (0.983-1.574) | 0.609          | (0.323-<br>1.149) | 1.190     | (0.503-<br>2.819) |
| Ever Smoked at Round 2                                            | 1.296***       | (1.114-<br>1.507) | 1.194        | (0.998-1.428) | 1.222          | (0.898-<br>1.662) | 1.128     | (0.740-<br>1.721) |
| Married at Round 2                                                | 0.881          | (0.734-<br>1.056) | 1.085        | (0.872-1.351) | 1.266          | (0.903-<br>1.775) | 0.854     | (0.559-<br>1.305) |
| 1st Wealth Quintile (Lowest<br>Wealth)                            | 1.532**        | (1.155-<br>2.032) | 1.603**      | (1.189-2.160) | 1.099          | (0.473-<br>2.549) | 2.002     | (0.781-<br>5.132) |
| 2nd Wealth Quintile                                               | 1.730***       | (1.337-<br>2.238) | 1.439**      | (1.115-1.857) | 0.822          | (0.360-<br>1.876) | 1.874     | (0.746-<br>4.711) |
| 3rd Wealth Quintile                                               | 1.254          | (0.998-<br>1.576) | 1.238        | (0.982-1.561) | 1.116          | (0.483-<br>2.579) | 1.633     | (0.629-<br>4.241) |
| 4th Wealth Quintile                                               | 1.037          | (0.837-<br>1.285) | 1.182        | (0.951-1.468) | 0.649          | (0.263-<br>1.597) | 1.718     | (0.645-<br>4.576) |
| No Longest Occupation                                             | 1.003          | (0.786-<br>1.280) | 1.118        | (0.831-1.505) | 0.942          | (0.596-<br>1.490) | 1.771     | (0.888-<br>3.530) |
| Longest Occupation Professional,<br>Managerial, Clerical or Sales | 1.211          | (0.996-<br>1.471) | 0.977        | (0.809-1.180) | 0.661*         | (0.437-<br>1.000) | 1.407     | (0.824-<br>2.404) |
| Observations                                                      | 3509           |                   | 3142         |               | 835            |                   | 559       |                   |

## Captions and Illustrations for Appendix Figures

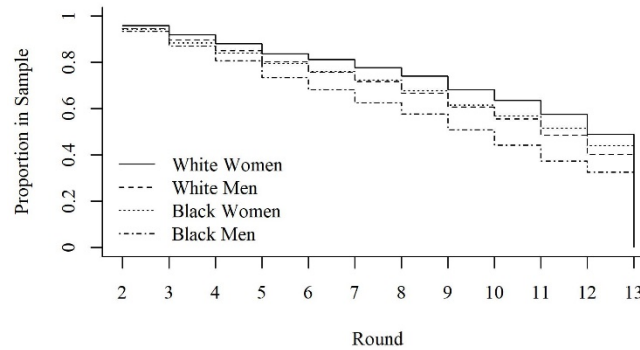

Figure A1. Proportion of starting cohort remaining in sample by race and gender at waves 2-13 of the HRS. The proportion remaining is on the y axis and the survey round is on the x axis. 4 line types are used corresponding to white women, white men, black women, and black men respectively.

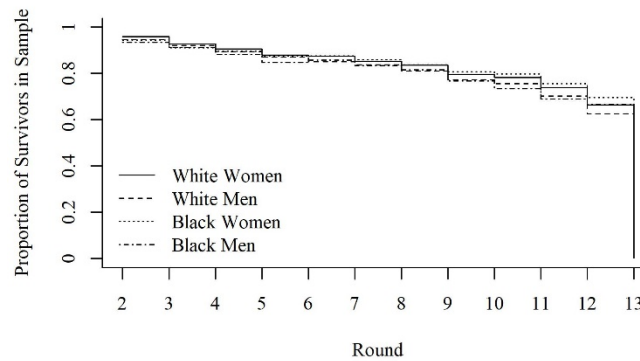

Figure A2. Proportion of surviving cohort members remaining in sample by race and gender at waves 2-13 of the HRS. The proportion of survivors remaining is on the y axis and the survey round is on the x axis. 4 line types are used corresponding to white women, white men, black women, and black men respectively.
